# Supplementary material for: A Two-eRNA-Based Signature Can Impact the Immune Status and Predict the Prognosis and Drug Sensitivity of Lung Adenocarcinoma
Source: Hindawi journal article supplement (doi:10.1155/2022/8069858), 2022-05-10

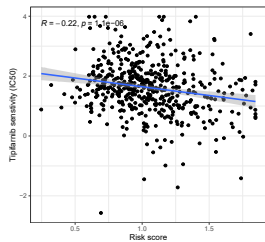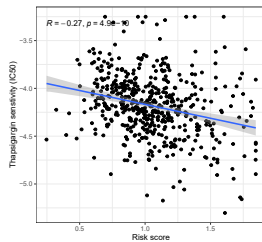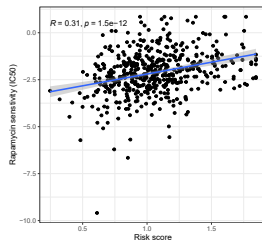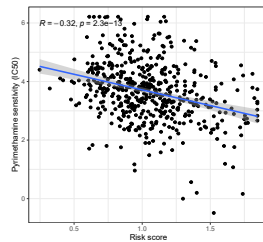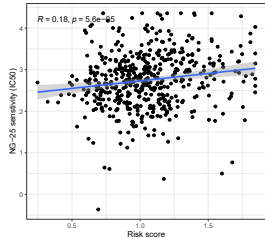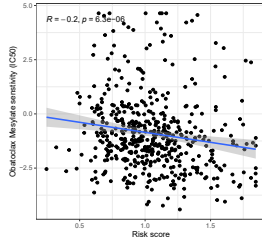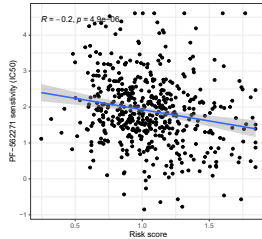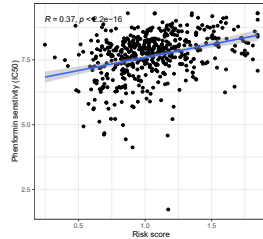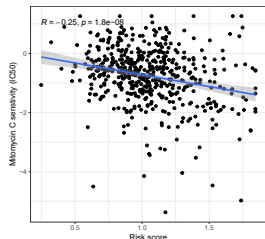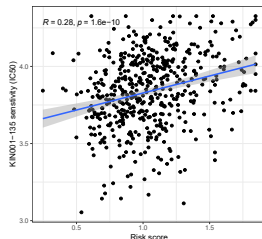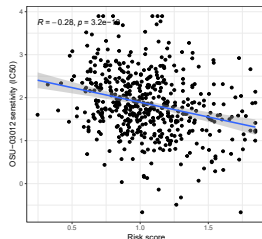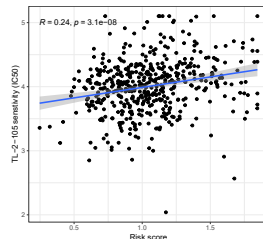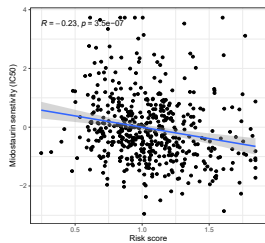

Supplement: f1 [file 8069858.f1.pdf]
